# Supplementary material for: Poor infection prevention and control standards are associated with environmental contamination with carbapenemase-producing Enterobacterales and other multidrug-resistant bacteria in Swiss companion animal clinics
Source: Springer Nature journal article supplement (doi:10.1186/s13756-020-00742-5), 2020-06-23
Supplement: MOESM1 [file 18112574]

**Additional file 1. Characteristics of the seven small animal veterinary clinics and practices included in the study.**

| <b>Institution</b>                       | <b>Clinic A</b> | <b>Clinic B</b> | <b>Clinic C</b> | <b>Clinic D</b> | <b>Clinic E</b> | <b>Practice F</b> | <b>Practice G</b> |
|------------------------------------------|-----------------|-----------------|-----------------|-----------------|-----------------|-------------------|-------------------|
| <b>Approximate no. of cases per year</b> | 8000–10000      | 6000–8000       | > 10000         | 6000–8000       | 4000–6000       | 6000-8000         | 2000–4000         |
| <b>No. of staff</b>                      | 224             | 110             | 82              | 20              | 11              | 10                | 5                 |
| <b>Primary opinion cases</b>             | Yes             | Yes             | Yes             | Yes             | Yes             | Yes               | Yes               |
| <b>Referred cases</b>                    | Yes             | Yes             | Yes             | Yes             | Yes             | No                | No                |
| <b>24/7 emergency service</b>            | Yes             | Yes             | Yes             | No              | No              | No                | No                |
| <b>Intensive care unit</b>               | Yes             | Yes             | Yes             | No              | No              | No                | No                |
| <b>Geographic region in Switzerland</b>  | Central         | Central         | Central         | Western         | Southern        | Eastern           | Western           |
