# Supplementary material for: Poor infection prevention and control standards are associated with environmental contamination with carbapenemase-producing Enterobacterales and other multidrug-resistant bacteria in Swiss companion animal clinics
Source: Springer Nature journal article supplement (doi:10.1186/s13756-020-00742-5), 2020-06-23
Supplement: MOESM3 [file 18112574]

## Additional file 3. Environmental sampling sites in Clinics A–C and Clinics/Practices D–G.

| Clinics A–C        |                           |                          |                                              | Clinics/Practices D–G |                       |                                 |                                              |
|--------------------|---------------------------|--------------------------|----------------------------------------------|-----------------------|-----------------------|---------------------------------|----------------------------------------------|
| Area               | Area specified            | Designation              | Sampling sites                               | Area                  | Designation           | Sampling sites                  |                                              |
| Waiting area       |                           | Lady's toilet            | Door handles & flushing bottoms              | Waiting area          | Rest rooms            | Door handles & flushing bottoms |                                              |
|                    |                           | Men's toilet             | Door handles & flushing bottoms              |                       |                       | Balance                         | Surface & bottoms                            |
|                    |                           | Balance                  | Surface & bottoms                            |                       | Consultation rooms    | Desktop                         | Phone, mouse & keyboard                      |
| Consultation rooms | General examination rooms | Desktop                  | Phone, mouse & keyboard                      |                       |                       | Examination tables              | Surfaces                                     |
|                    |                           | Examination tables       | Surface                                      |                       |                       | Cupboards                       | Handles                                      |
|                    |                           | Cupboards                | Handles                                      |                       | Door & light switch   | Handles & switch                |                                              |
|                    |                           | Door & light switch      | Handles & switches                           |                       | Working surface       | Surface                         |                                              |
|                    |                           | Emergency room           | Examination tables                           | Surface               | Radiology             | Working area                    | Examination table, cassette & release bottom |
|                    |                           | Cupboards                | Handles                                      |                       |                       | Desktop                         | Phone, mouse & keyboard                      |
| ICU                |                           | Desktop                  | Phone, mouse & keyboard                      | Ward                  | Animal boxes for dogs | Surface                         |                                              |
|                    |                           | Central examination area | Surface                                      |                       |                       | Animal boxes for cats           | Surface                                      |
|                    |                           | Oxygen boxes             | Surface                                      |                       |                       | Infusion pump                   | Surface                                      |
|                    |                           | Infusion pumps           | Surface                                      |                       |                       | Heat mat / heating lamp         | Surface                                      |
|                    |                           | Animal boxes             | Surface                                      |                       |                       | Mobile balance                  | Surface & bottoms                            |
|                    |                           | Collars & leashes        | Surface                                      |                       |                       | Cupboards                       | Handles                                      |
|                    |                           |                          |                                              |                       |                       | Working surface                 | Surface                                      |
| Radiology          | General radiology         | Working area             | Examination table, cassette & release bottom | Pre-OR area           | Examination tables    | Surface                         |                                              |
|                    |                           | Desktop                  | Phone, mouse & keyboard                      |                       |                       | Anesthetic apparatus            | Surface                                      |
|                    |                           | Radiology in OR          |                                              |                       | Keyboard & bottoms    |                                 | Cupboards                                    |
| Ward               |                           | Animal boxes for dogs    | Surface                                      |                       | Working surface       | Surface                         |                                              |
|                    |                           | Animal boxes for cats    | Surface                                      |                       | Desktop               | Phone, mouse & keyboard         |                                              |
|                    |                           | Waste drains             | Surface                                      | OR                    | Table                 | Surface                         |                                              |
|                    |                           | Physiotherapy            | Mats & pillows                               |                       |                       | Heat mat / Bear hugger          | Surface                                      |
| Quarantine ward    |                           | Animal boxes             | Surface                                      |                       |                       |                                 |                                              |

|                    |                      |                               |                         |                   |                                    |                                  |
|--------------------|----------------------|-------------------------------|-------------------------|-------------------|------------------------------------|----------------------------------|
|                    |                      | Cupboards                     | Handles                 |                   | Anesthetic apparatus               | Surface                          |
|                    |                      | Balance                       | Surface & bottoms       |                   | Surgical threats cartoons          | Surface                          |
|                    |                      |                               |                         |                   | Antiseptic bottle                  | Surface                          |
| <b>Pre-OR area</b> |                      | Examination tables            | Surface                 |                   | Working surface                    | Surface                          |
|                    |                      | Warming mats / Bear hugger    | Surface                 |                   | Cupboards                          | Handles                          |
|                    |                      | Anesthetic apparatus          | Surface                 | <b>Laboratory</b> | Centrifuge & blood gas device      | Bottoms                          |
|                    |                      | Animal boxes                  | Surface                 |                   | Desktop                            | Phone, mouse & keyboard          |
|                    |                      | Cupboards                     | Handles                 |                   | Microscope                         | Surface                          |
|                    | <b>Office</b>        | Desktop                       | Phone, mouse & keyboard |                   | Doors & cupboards                  | Handles                          |
|                    |                      | Table & shelves               | Surface                 |                   | Working surface                    | Surface                          |
| <b>OR</b>          | <b>Septic OR</b>     | Table                         | Surface                 | <b>Office</b>     | Desktop                            | Phone, mouse & keyboard          |
|                    |                      | Warming mat / Bear hugger     | Surface                 |                   | Table & shelves                    | Surface                          |
|                    |                      | Anesthetic apparatus          | Surface                 | <b>Utensils</b>   | Mobile phones / pagers             | Surface                          |
|                    |                      | Surgical threats cartoons     | Surface                 |                   | Stethoscopes                       | Surface                          |
|                    |                      | Antiseptic bottle             | Surface                 |                   | Thermometers                       | Surface                          |
|                    | <b>Orthopedic OR</b> | Table                         | Surface                 |                   | Otosopes                           | Surface                          |
|                    |                      | Warming mat / Bear hugger     | Surface                 |                   | Clippers                           | Surface                          |
|                    |                      | Anesthetic apparatus          | Surface                 |                   | Ultrasonography devices            |                                  |
|                    |                      | Surgical threats cartoons     | Surface                 |                   | Scissors & clamps                  | Surface                          |
|                    |                      | Antiseptic bottle             | Surface                 |                   | Muzzles                            | Surface                          |
| <b>Laboratory</b>  |                      | Centrifuge & blood gas device | Bottoms                 |                   | Dental cleaning devices / utensils | Surface                          |
|                    |                      | Desktop                       | Phone, mouse & keyboard | <b>Others</b>     | Flatware & bowls                   | Surface                          |
|                    |                      | Microscope                    | Surface                 |                   | Lingerie                           | Washing machine & dryer, surface |
|                    |                      | Door                          | Handle                  |                   | Changing room                      | Sheds, cabinets                  |
| <b>Endoscopy</b>   |                      | Working canal                 | Entry & exit            |                   | Sterilizer                         | Inner surface                    |
| <b>Dental room</b> |                      | Examination table             | Surface                 |                   | Sterilizer                         | Handles, buttons                 |
|                    |                      | Anesthetic apparatus          | Surface                 |                   |                                    |                                  |

|                 |                                  |                                             |                                 |
|-----------------|----------------------------------|---------------------------------------------|---------------------------------|
| <b>Utensils</b> |                                  | Dental cleaning device                      | Surface                         |
|                 |                                  | Transport boxes                             | Surface                         |
|                 |                                  | Transport trolleys                          | Surface                         |
|                 |                                  | Mobile phones / pagers                      | Surface                         |
|                 |                                  | Stethoscopes                                | Surface                         |
|                 |                                  | Thermometers                                | Surface                         |
|                 |                                  | Otosopes                                    | Surface                         |
|                 |                                  | Clippers                                    | Surface                         |
|                 |                                  | Ultrasonography device                      | Surface                         |
|                 |                                  | Scissors & clamps                           | Surface                         |
| <b>Others</b>   |                                  | Sharp drops                                 | Surface                         |
|                 | <b>Elevator</b>                  | Bottoms                                     | Surface                         |
|                 | <b>Bath</b>                      | Working area                                | Surface & handles               |
|                 | <b>Feeding kitchen</b>           | Working area                                | Surface & handles               |
|                 | <b>Feeding kitchen</b>           | Flatware & bowls                            | Surface                         |
|                 | <b>Lingerie</b>                  | Washing machine & dryer                     | Surface                         |
|                 | <b>Staff toilet</b>              | Ladies room, door handle & flushing bottoms | Door handles & flushing bottoms |
|                 | <b>Pneumatic dispatch system</b> | Door handle                                 | Surface                         |
|                 | <b>Pneumatic dispatch system</b> | Containers                                  | Surface                         |

---

*Abbreviations:* ICU, intensive care unit; OR, operating room.
