# Supplementary material for: Poor infection prevention and control standards are associated with environmental contamination with carbapenemase-producing Enterobacterales and other multidrug-resistant bacteria in Swiss companion animal clinics
Source: Springer Nature journal article supplement (doi:10.1186/s13756-020-00742-5), 2020-06-23
Supplement: MOESM4 [file 18112574]

## Additional file 4. Detailed infection prevention and control scoring for Clinics/Practices A–G.

| Area                               | Topic                                   | Institution |          |          |          |          |            |            | Sum per area for the 7 evaluated institutions | Maximum possible sum per area for 7 institutions |
|------------------------------------|-----------------------------------------|-------------|----------|----------|----------|----------|------------|------------|-----------------------------------------------|--------------------------------------------------|
|                                    |                                         | Clinic A    | Clinic B | Clinic C | Clinic D | Clinic E | Practice F | Practice G |                                               |                                                  |
| IPC management                     | Hygiene manual                          | 2           | 1        | 2        | 0        | 0        | 0          | 0          | 5                                             | 14                                               |
|                                    | Designated IPC team/person              | 2           | 1        | 2        | 2        | 0        | 0          | 2          | 9                                             | 14                                               |
|                                    | Regular audits                          | 0           | 0        | 0        | 0        | 0        | 0          | 0          | 0                                             | 14                                               |
|                                    | <b>Sum</b>                              | <b>4</b>    | <b>2</b> | <b>4</b> | <b>2</b> | <b>0</b> | <b>0</b>   | <b>2</b>   | <b>14</b>                                     | <b>42</b>                                        |
| Staff education                    | Hand hygiene                            | 2           | 2        | 2        | 2        | 0        | 0          | 0          | 8                                             | 14                                               |
|                                    | General IPC                             | 2           | 1        | 1        | 1        | 0        | 0          | 0          | 5                                             | 14                                               |
|                                    | Antimicrobial stewardship               | 1           | 1        | 0        | 2        | 0        | 0          | 0          | 4                                             | 14                                               |
|                                    | <b>Sum</b>                              | <b>5</b>    | <b>4</b> | <b>3</b> | <b>5</b> | <b>0</b> | <b>0</b>   | <b>0</b>   | <b>17</b>                                     | <b>42</b>                                        |
| Cleaning/disinfection              | Written & updated protocols             | 1           | 0        | 0        | 2        | 0        | 0          | 1          | 4                                             | 14                                               |
|                                    | Spectrum and application                | 2           | 1        | 2        | 2        | 2        | 2          | 1          | 12                                            | 14                                               |
|                                    | Information dissemination               | 2           | 1        | 0        | 2        | 1        | 1          | 2          | 9                                             | 14                                               |
|                                    | <b>Sum</b>                              | <b>5</b>    | <b>2</b> | <b>2</b> | <b>6</b> | <b>3</b> | <b>3</b>   | <b>4</b>   | <b>25</b>                                     | <b>42</b>                                        |
| Quarantine measures                | Structure and work-flow                 | 2           | 1        | 1        | 1        | 0        | 2          | 0          | 7                                             | 14                                               |
|                                    | Information dissemination               | 2           | 0        | 0        | 0        | 0        | 0          | 0          | 2                                             | 14                                               |
|                                    | Cleaning / disinfection                 | 2           | 0        | 1        | 2        | 1        | 1          | 0          | 7                                             | 14                                               |
|                                    | <b>Sum</b>                              | <b>6</b>    | <b>1</b> | <b>2</b> | <b>3</b> | <b>1</b> | <b>3</b>   | <b>0</b>   | <b>16</b>                                     | <b>42</b>                                        |
| Guidelines for patients with MDROs | Definition/designation of MDRO patients | 1           | 1        | 0        | 0        | 0        | 0          | 0          | 2                                             | 14                                               |
|                                    | Protective measures                     | 2           | 2        | 1        | 1        | 0        | 1          | 0          | 7                                             | 14                                               |
|                                    | <b>Sum</b>                              | <b>3</b>    | <b>3</b> | <b>1</b> | <b>1</b> | <b>0</b> | <b>1</b>   | <b>0</b>   | <b>9</b>                                      | <b>28</b>                                        |
| Hand hygiene                       | Hand sanitizer                          | 2           | 0        | 2        | 2        | 0        | 2          | 1          | 9                                             | 14                                               |
|                                    | Washing lotion                          | 2           | 1        | 1        | 2        | 0        | 2          | 1          | 9                                             | 14                                               |
|                                    | Skin protection products                | 1           | 0        | 0        | 2        | 0        | 0          | 0          | 3                                             | 14                                               |
|                                    | Disposable towels                       | 2           | 2        | 2        | 2        | 2        | 2          | 1          | 13                                            | 14                                               |
|                                    | <b>Sum</b>                              | <b>7</b>    | <b>3</b> | <b>5</b> | <b>8</b> | <b>2</b> | <b>6</b>   | <b>3</b>   | <b>34</b>                                     | <b>56</b>                                        |
| Personal hygiene                   | Working clothes                         | 2           | 1        | 1        | 2        | 2        | 1          | 1          | 10                                            | 14                                               |

|                                                          |                                                      |           |           |           |           |           |           |           |            |            |
|----------------------------------------------------------|------------------------------------------------------|-----------|-----------|-----------|-----------|-----------|-----------|-----------|------------|------------|
|                                                          | Hand jewelry and nails                               | 2         | 1         | 0         | 1         | 0         | 1         | 0         | 5          | 14         |
|                                                          | Food consumption                                     | 1         | 1         | 1         | 2         | 0         | 1         | 0         | 6          | 14         |
|                                                          | Food storage                                         | 1         | 1         | 1         | 2         | 0         | 1         | 0         | 6          | 14         |
|                                                          | Personnel changing rooms                             | 1         | 1         | 1         | 1         | 1         | 1         | 0         | 6          | 14         |
|                                                          | Laundry                                              | 2         | 2         | 1         | 1         | 0         | 1         | 1         | 8          | 14         |
|                                                          | <b>Sum</b>                                           | <b>9</b>  | <b>7</b>  | <b>5</b>  | <b>9</b>  | <b>3</b>  | <b>6</b>  | <b>2</b>  | <b>41</b>  | <b>84</b>  |
| <b>Protection of employees</b>                           | Vaccinations                                         | 1         | 2         | 1         | 0         | 2         | 2         | 1         | 9          | 14         |
|                                                          | Measures for pregnant/<br>immunosuppressed employees | 1         | 1         | 1         | 1         | 1         | 1         | 1         | 7          | 14         |
|                                                          | <b>Sum</b>                                           | <b>2</b>  | <b>3</b>  | <b>2</b>  | <b>1</b>  | <b>3</b>  | <b>3</b>  | <b>2</b>  | <b>16</b>  | <b>28</b>  |
| <b>Protective clothing</b>                               | Composition                                          | 2         | 2         | 2         | 1         | 1         | 1         | 0         | 9          | 14         |
|                                                          | Use                                                  | 2         | 1         | 1         | 2         | 1         | 1         | 0         | 8          | 14         |
|                                                          | Storage and provision                                | 2         | 1         | 1         | 1         | 1         | 2         | 0         | 8          | 14         |
|                                                          | <b>Sum</b>                                           | <b>6</b>  | <b>4</b>  | <b>4</b>  | <b>4</b>  | <b>3</b>  | <b>4</b>  | <b>0</b>  | <b>25</b>  | <b>42</b>  |
| <b>Medication</b>                                        | Preparation                                          | 1         | 1         | 1         | 2         | 1         | 1         | 2         | 9          | 14         |
|                                                          | Storage                                              | 2         | 1         | 2         | 2         | 2         | 2         | 2         | 13         | 14         |
|                                                          | Dating of open vials                                 | 1         | 0         | 2         | 2         | 0         | 0         | 2         | 7          | 14         |
|                                                          | <b>Sum</b>                                           | <b>4</b>  | <b>2</b>  | <b>5</b>  | <b>6</b>  | <b>3</b>  | <b>3</b>  | <b>6</b>  | <b>29</b>  | <b>42</b>  |
| <b>Guidelines and restrictions for antimicrobial use</b> | Guidelines for antimicrobial use and dosing          | 2         | 2         | 0         | 2         | 1         | 2         | 1         | 10         | 14         |
|                                                          | Restrictions for critically important antimicrobials | 2         | 2         | 0         | 1         | 0         | 2         | 0         | 7          | 14         |
|                                                          | <b>Sum</b>                                           | <b>4</b>  | <b>4</b>  | <b>0</b>  | <b>3</b>  | <b>1</b>  | <b>4</b>  | <b>1</b>  | <b>17</b>  | <b>28</b>  |
| <b>Total score</b>                                       |                                                      | <b>55</b> | <b>35</b> | <b>33</b> | <b>48</b> | <b>19</b> | <b>33</b> | <b>20</b> | <b>243</b> | <b>476</b> |

*Abbreviations:* IPC, Infection prevention and control; MDROs, multidrug resistant organisms.
